# Supplementary material for: Rapid microchip-based FAIMS determination of trimethylamine, an indicator of pork deterioration
Source: Royal Society of Chemistry journal article supplement (doi:10.1039/c3ay41941j), 2014-01-01
Supplement: c3ay41941j.pdf [file c3ay41941j.pdf]

## supplementary materials

### 1. Standard Curve

Standard solutions were made of trimethylamine hydrochloride taken directly from the flask. Concentrations were: 0.5  $\mu\text{g mL}^{-1}$ , 1.0  $\mu\text{g mL}^{-1}$ , 2.0  $\mu\text{g mL}^{-1}$ , 4.0  $\mu\text{g mL}^{-1}$ , 6.0  $\mu\text{g mL}^{-1}$ , 8.0  $\mu\text{g mL}^{-1}$  and 10.0  $\mu\text{g mL}^{-1}$ . A 100  $\mu\text{L}$  of these solutions and 100  $\mu\text{L}$  of 8 mol/L NaOH were added to dynamic headspace sampler. So actually the concentrations of standard solutions were 0.25  $\mu\text{g mL}^{-1}$ , 0.5  $\mu\text{g mL}^{-1}$ , 1.0  $\mu\text{g mL}^{-1}$ , 2.0  $\mu\text{g mL}^{-1}$ , 3.0  $\mu\text{g mL}^{-1}$ , 4  $\mu\text{g mL}^{-1}$ , 5 $\mu\text{g mL}^{-1}$ . The positive ion spectra from FAIMS were analyzed at 142Td. Standard Curve was shown as Fig.1.

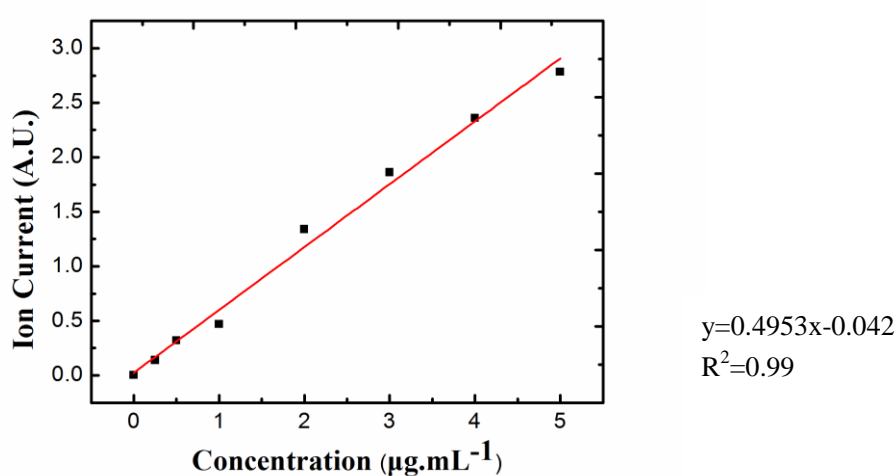

Fig. 1 Dependence of the ion current on the concentration of standard solution

The formula of LOD (Limit of Detection) is as follows:

$$\text{LOD} = 3\sigma/S$$

Where  $\sigma$  is the standard deviation of blank solutions, S is the slope of calibration curve.

Ten blank samples were measured separately, and their standard deviation was used to estimate LOD and LOQ(Limit of Quantity). The value of  $\sigma$  is 0.00248.

$$\text{LOD} = 3 \sigma/S=0.015 \mu\text{g/mL}$$

The LOD is 3 ng for TMA dissolved in deionized water.

$$\text{LOQ} = 10\sigma/S=0.05 \mu\text{g/mL}$$

The LOD is 10 ng for TMA dissolved in deionized water.
